# Supplementary material
Source: publisher figshare collection journal article supplement (https://acs.figshare.com/ndownloader/files/3708292)
Supplement: Supplementary file 1 [file 3708292]

## Supporting Information

### Luminescent Alkyne-Bearing Terbium(III) Complexes and their Application to Bioorthogonal Protein Labeling

William I. O'Malley, Elwy H. Abdelkader, Margaret L. Aulsebrook, Riccardo Rubbiani, Choy-Theng Loh, Michael R. Grace, Leone Spiccia, Gilles Gasser, Gottfried Otting, Kellie L. Tuck, Bim Graham

| <b>Contents</b>                         | <b>Pages</b> |
|-----------------------------------------|--------------|
| Luminescence lifetime measurements      | 2–4          |
| Luminescence of labeled protein samples | 5–6          |
| NMR spectra of reported compounds       | 7–13         |
| LC traces for ligands                   | 14           |
| LC traces for terbium(III) complexes    | 15           |

## **Luminescence lifetime measurements**

Lifetime measurements were performed on a Varian Cary Eclipse fluorescence spectrophotometer using a 1 cm path length quartz cuvette and the following settings: total decay time = 30 ms, number of flashes = 1, delay time = 0.1 ms, gate time = 0.1 ms, excitation slit width = 5 nm, emission slit width = 5 nm, number of cycles = 100. Samples were prepared at 10  $\mu$ M concentration in both H<sub>2</sub>O and D<sub>2</sub>O. Samples were excited at their respective  $\lambda_{\text{max}}$ : 287 nm for Tb-L<sup>1</sup> and 300 nm for “clicked” Tb-L<sup>1</sup>. Emission intensity was recorded at 543 nm. The resulting luminescence decay curves were fitted to following equation using the SigmaPlot software:

$$I_t = I_0 * \exp(-t/\tau)$$

where  $I_t$  is the intensity at time  $t$  after the excitation flash,  $I_0$  is the initial intensity at  $t = 0$ , and  $\tau$  is the luminescence lifetime.

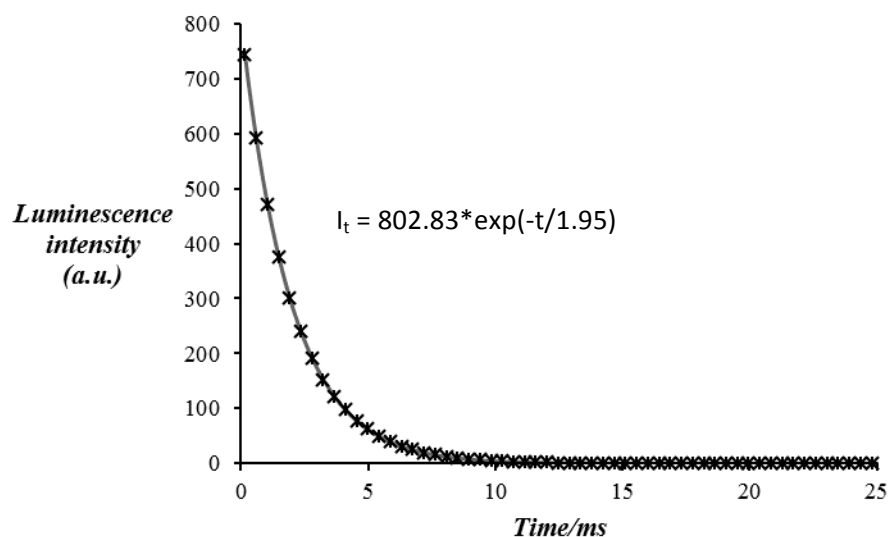

**Figure S1.** Luminescence decay for Tb-L<sup>1</sup> in H<sub>2</sub>O;  $\tau = 1.95$  ms. Experimental data points are marked by crosses (with only one in every four data points shown to aid clarity) and the fitted curve is shown as a solid gray line.

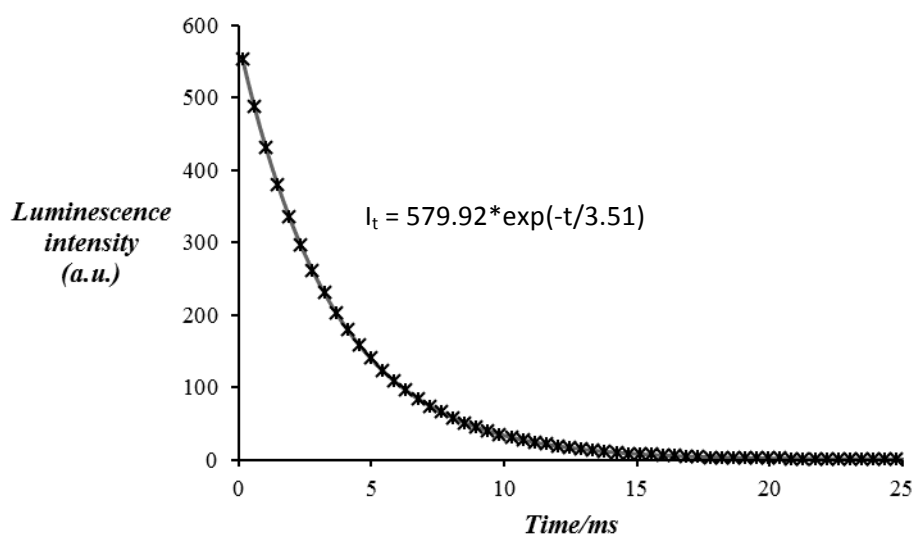

**Figure S2.** Luminescence decay for Tb-L<sup>1</sup> in D<sub>2</sub>O;  $\tau = 3.51$  ms. Experimental data points are marked by crosses (with only one in every four data points shown to aid clarity) and the fitted curve is shown as a solid gray line.

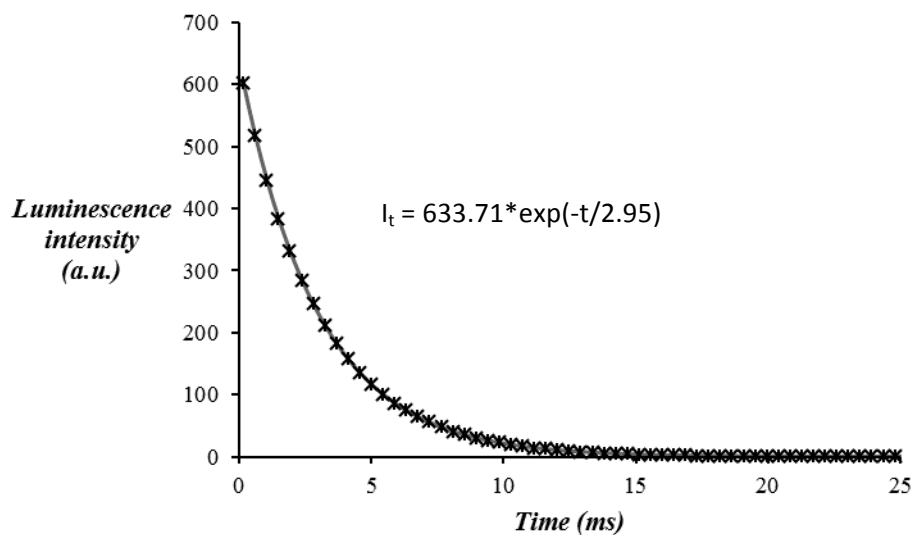

**Figure S3.** Luminescence decay for clicked Tb-L<sup>1</sup> in H<sub>2</sub>O;  $\tau = 2.95$  ms. Experimental data points are marked by crosses (with only one in every four data points shown to aid clarity) and the fitted curve is shown as a solid gray line.

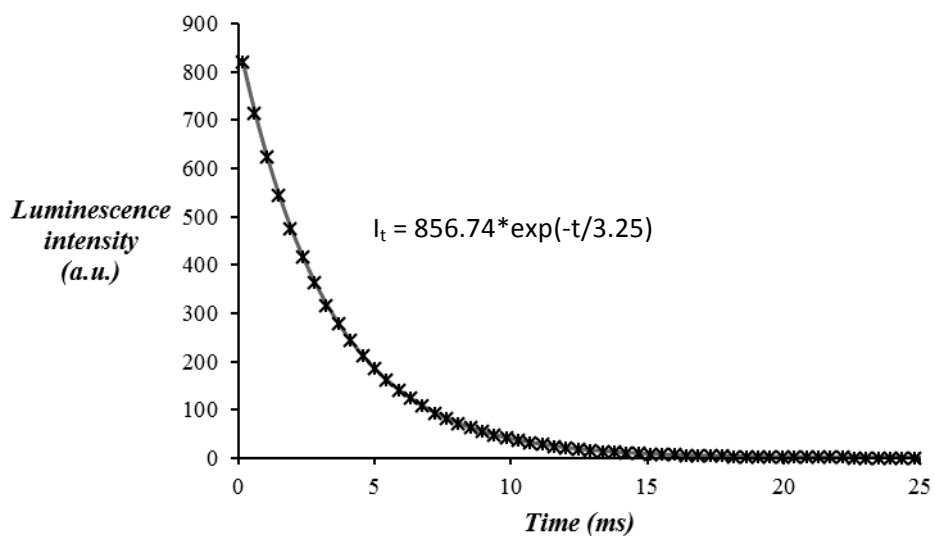

**Figure S4.** Luminescence decay for clicked Tb-L<sup>1</sup> in D<sub>2</sub>O;  $\tau = 3.25$  ms. Experimental data points are marked by crosses (with only one in every four data points shown to aid clarity) and the fitted curve is shown as a solid gray line.

## Luminescence of labeled protein samples

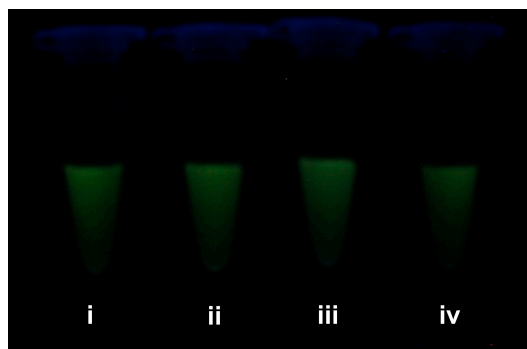

**Figure S5.** Photograph of spin-dialyzed solutions of labelled DEBP samples (*ca.* 10  $\mu\text{M}$  in  $\text{H}_2\text{O}$ ) irradiated with a common laboratory TLC lamp (254 nm): (i) DEBP-Q80AzF+Tb- $\text{L}^1$ , (ii) DEBP-Q80AzF+Tb- $\text{L}^2$ , (iii) DEBP-Q80AzMF+Tb- $\text{L}^1$ , (iv) DEBP-Q80AzMF+Tb- $\text{L}^2$ .

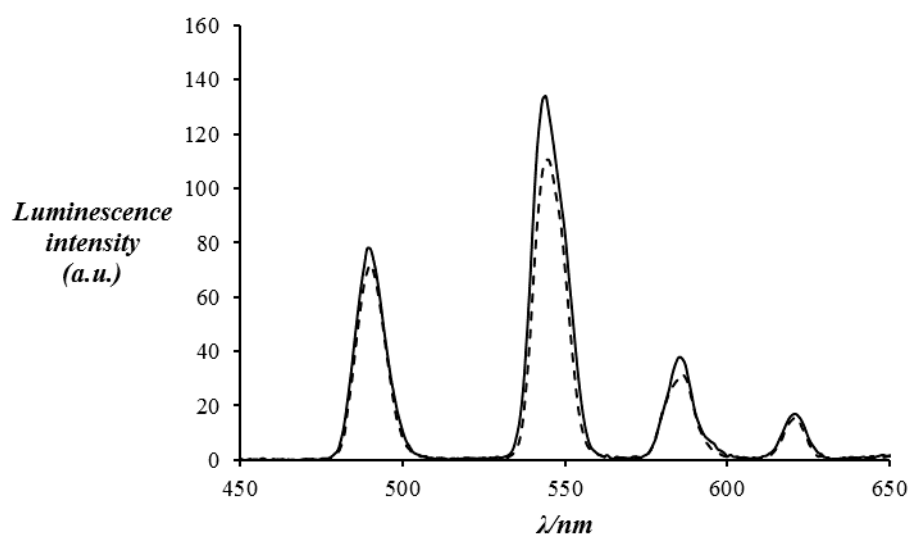

**Figure S6.** Luminescence emission spectra of DEBP-Q80AzF+Tb- $\text{L}^1$  (*ca.* 10  $\mu\text{M}$  in  $\text{H}_2\text{O}$ ) excited at 300 nm (dashed line) and DEBP-Q80AzF+Tb- $\text{L}^2$  (*ca.* 10  $\mu\text{M}$  in  $\text{H}_2\text{O}$ ) excited at 274 nm (solid line).

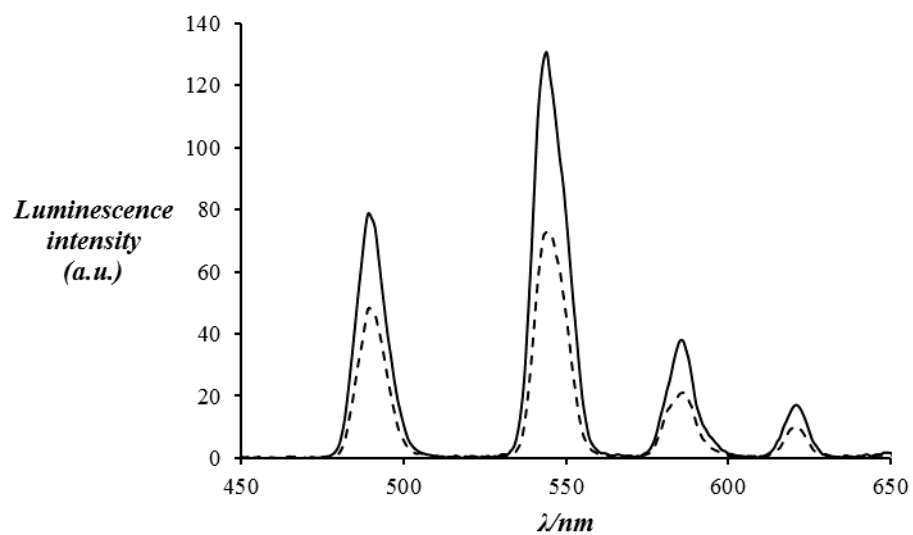

**Figure S7.** Luminescence emission spectra of DEBP-Q80AzMF+Tb-L<sup>1</sup> (ca. 10  $\mu$ M in H<sub>2</sub>O) excited at 300 nm (dashed line) and DEBP-Q80AzMF+Tb-L<sup>2</sup> (ca. 10  $\mu$ M in H<sub>2</sub>O) excited at 274 nm (solid line).

## NMR spectra of reported compounds

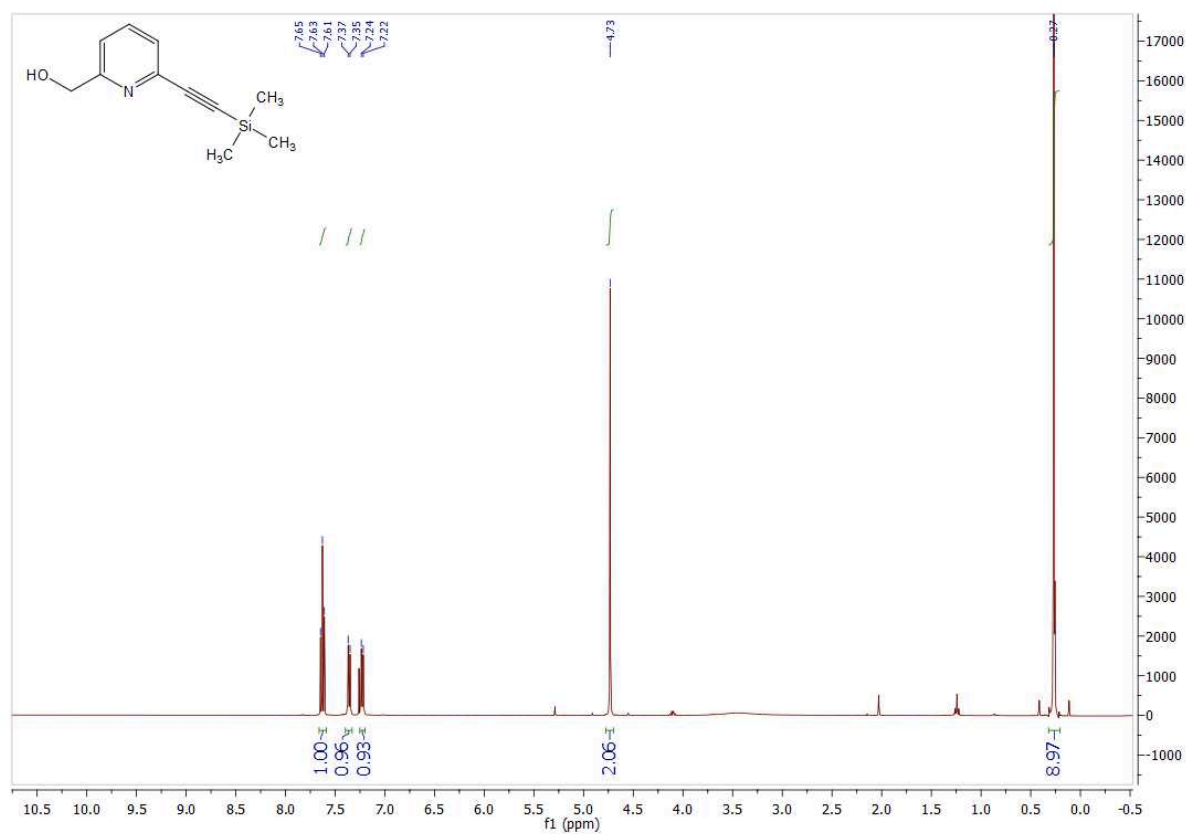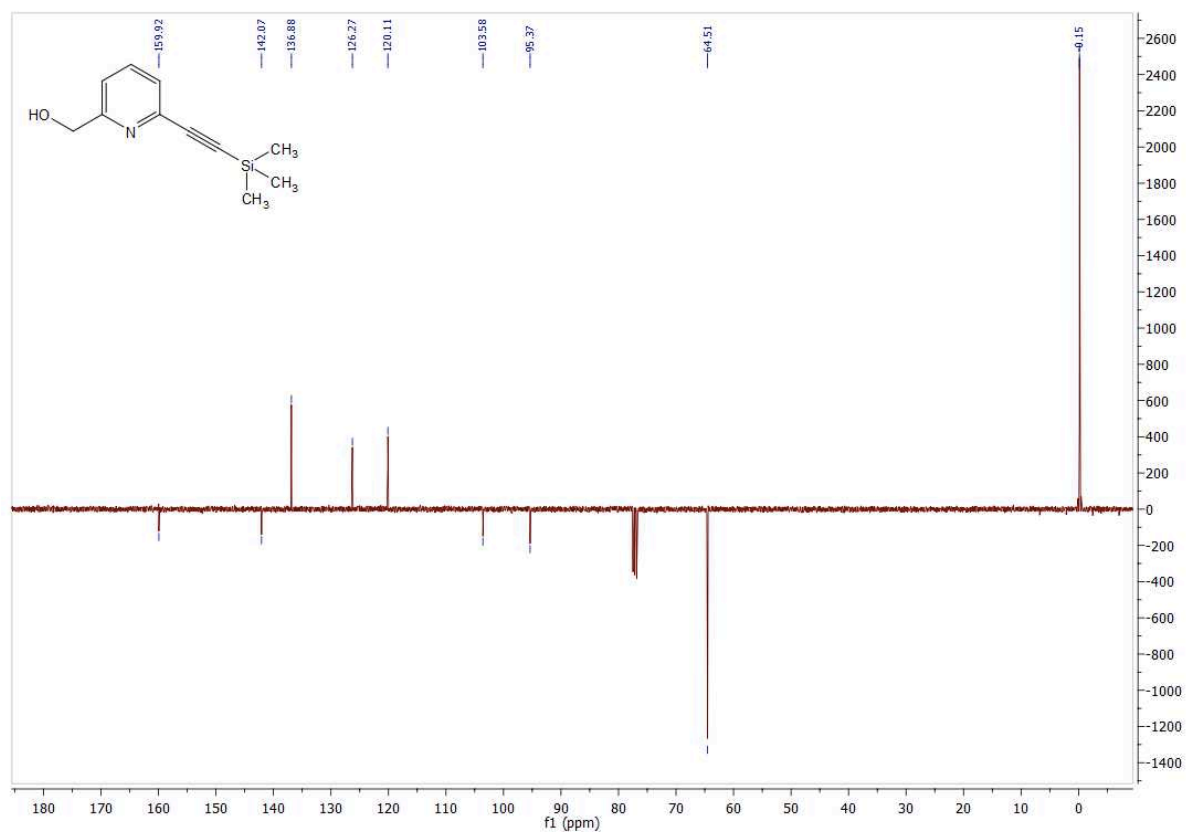

**Figure S8.** <sup>1</sup>H and <sup>13</sup>C NMR spectra of **2** in CDCl<sub>3</sub>.

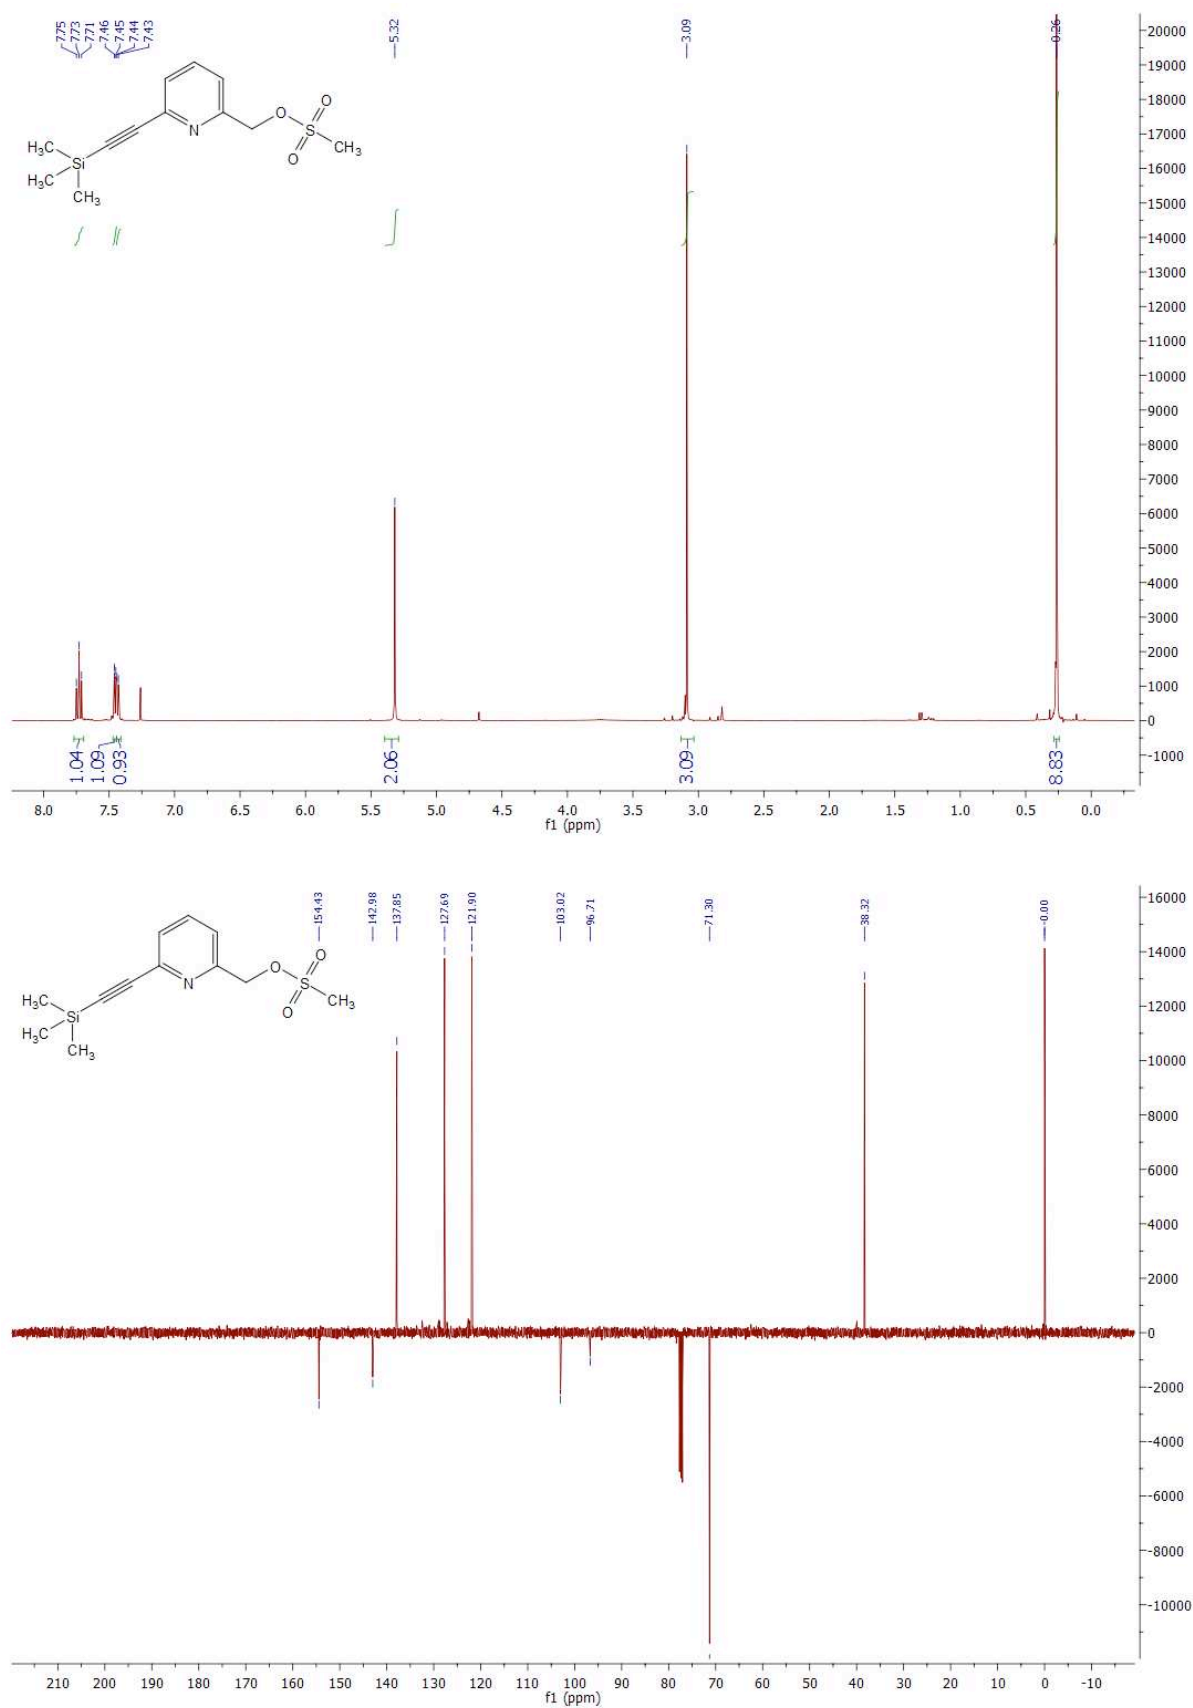

**Figure S9.** <sup>1</sup>H and <sup>13</sup>C NMR spectra of **3** in CDCl<sub>3</sub>.



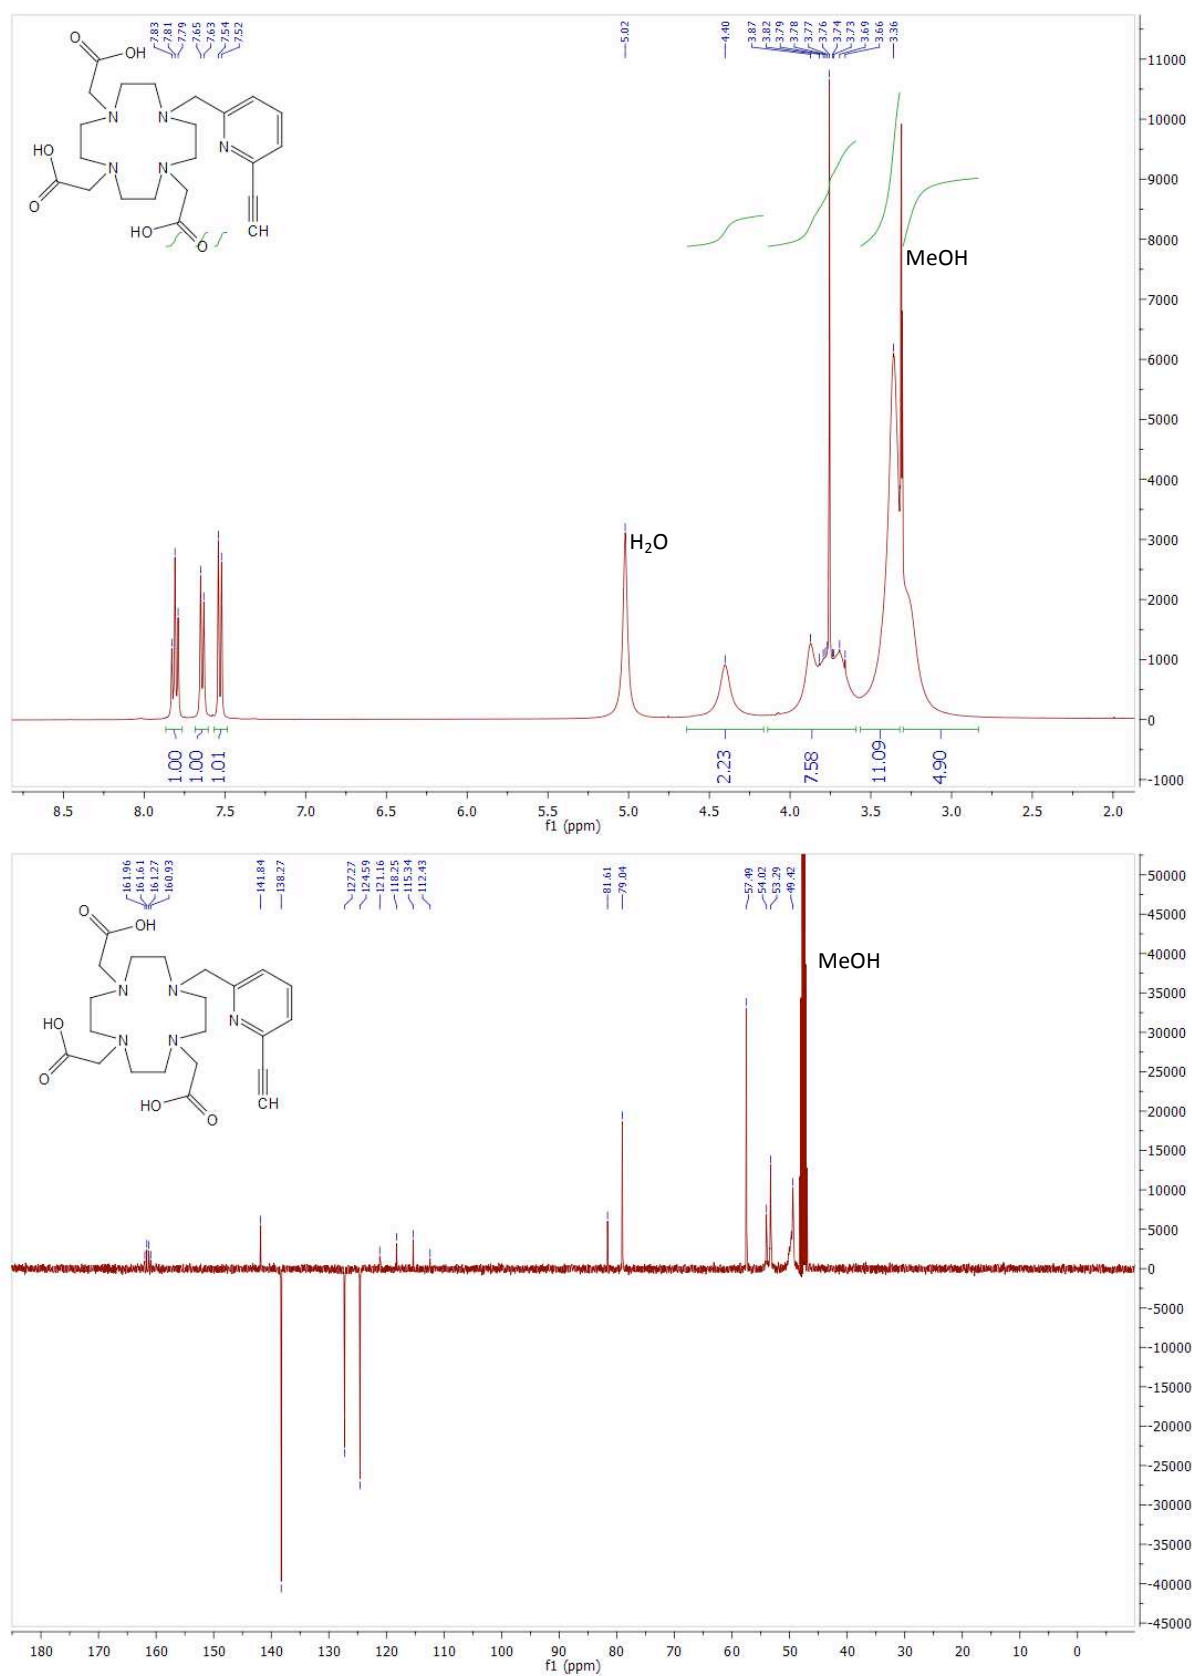

**Figure S10.** <sup>1</sup>H and <sup>13</sup>C NMR spectra of H<sub>3</sub>L<sup>1</sup> in MeOD.

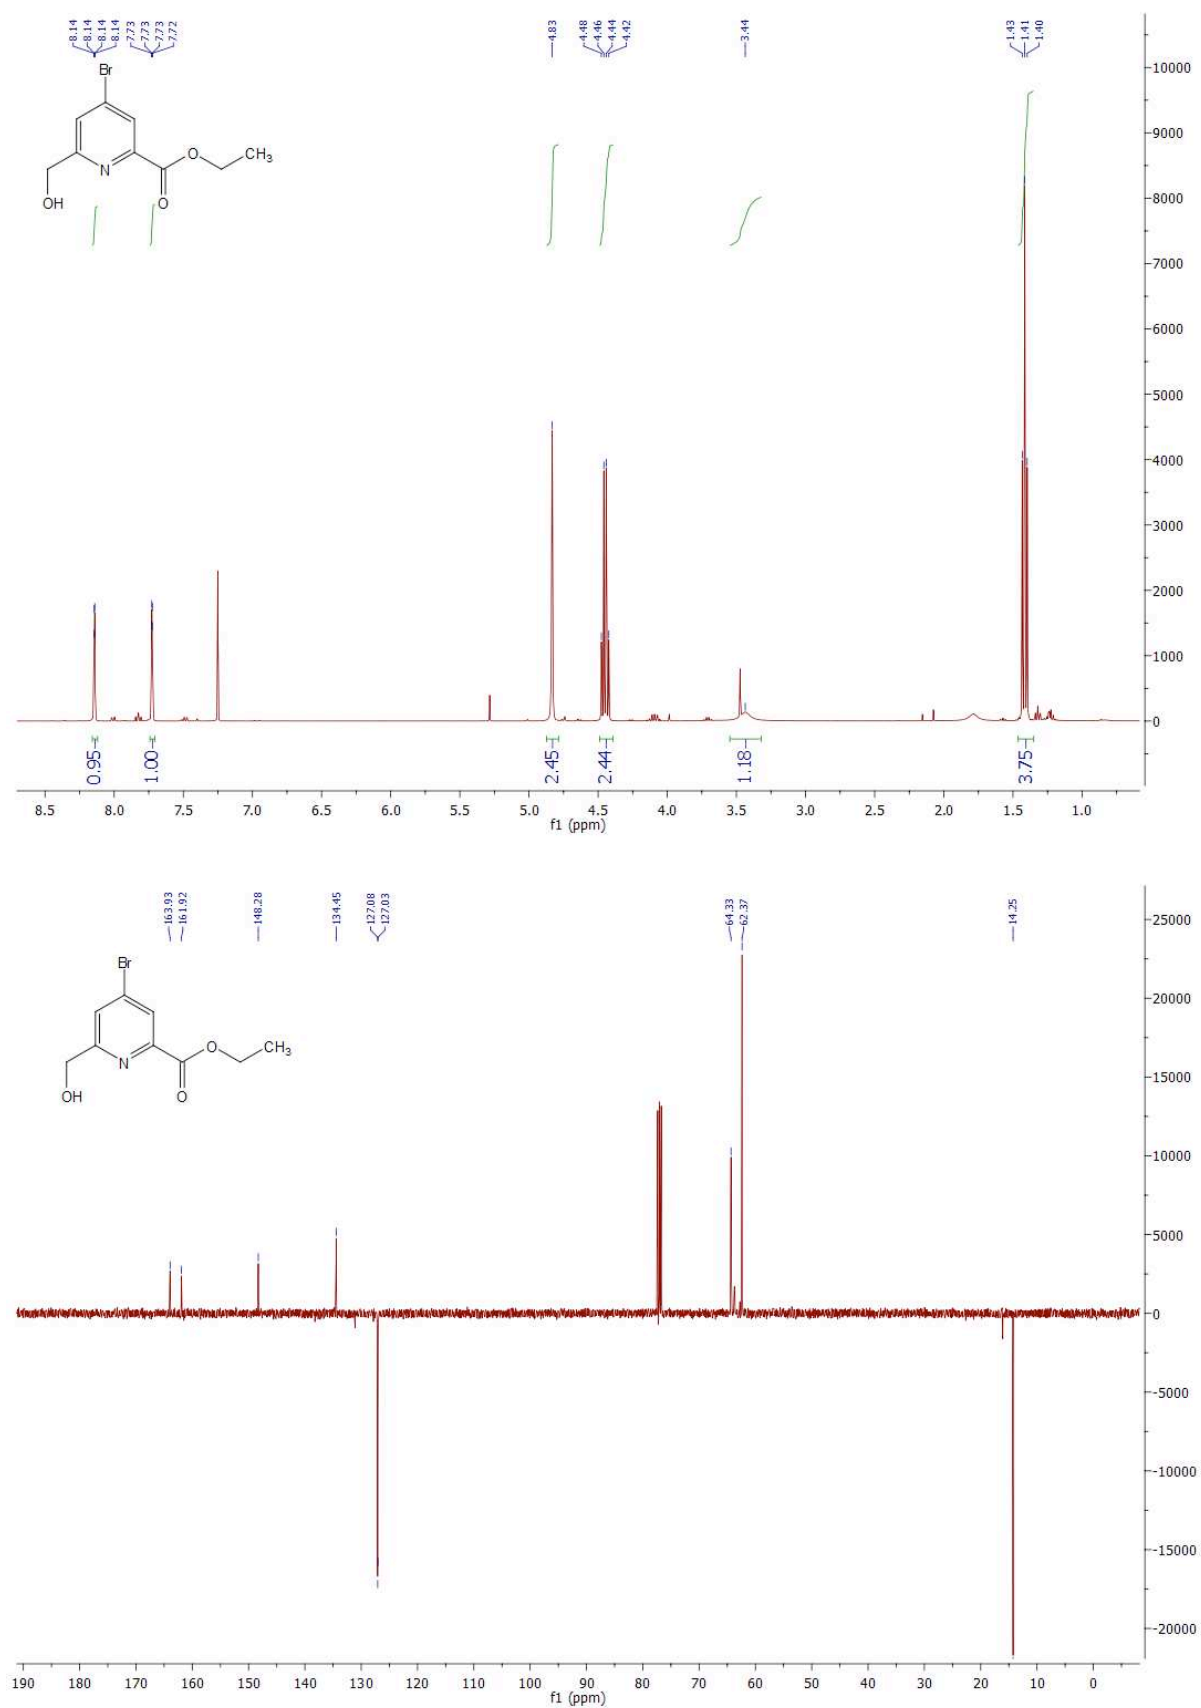

**Figure S11.** <sup>1</sup>H and <sup>13</sup>C NMR spectra of **5** in CDCl<sub>3</sub>.

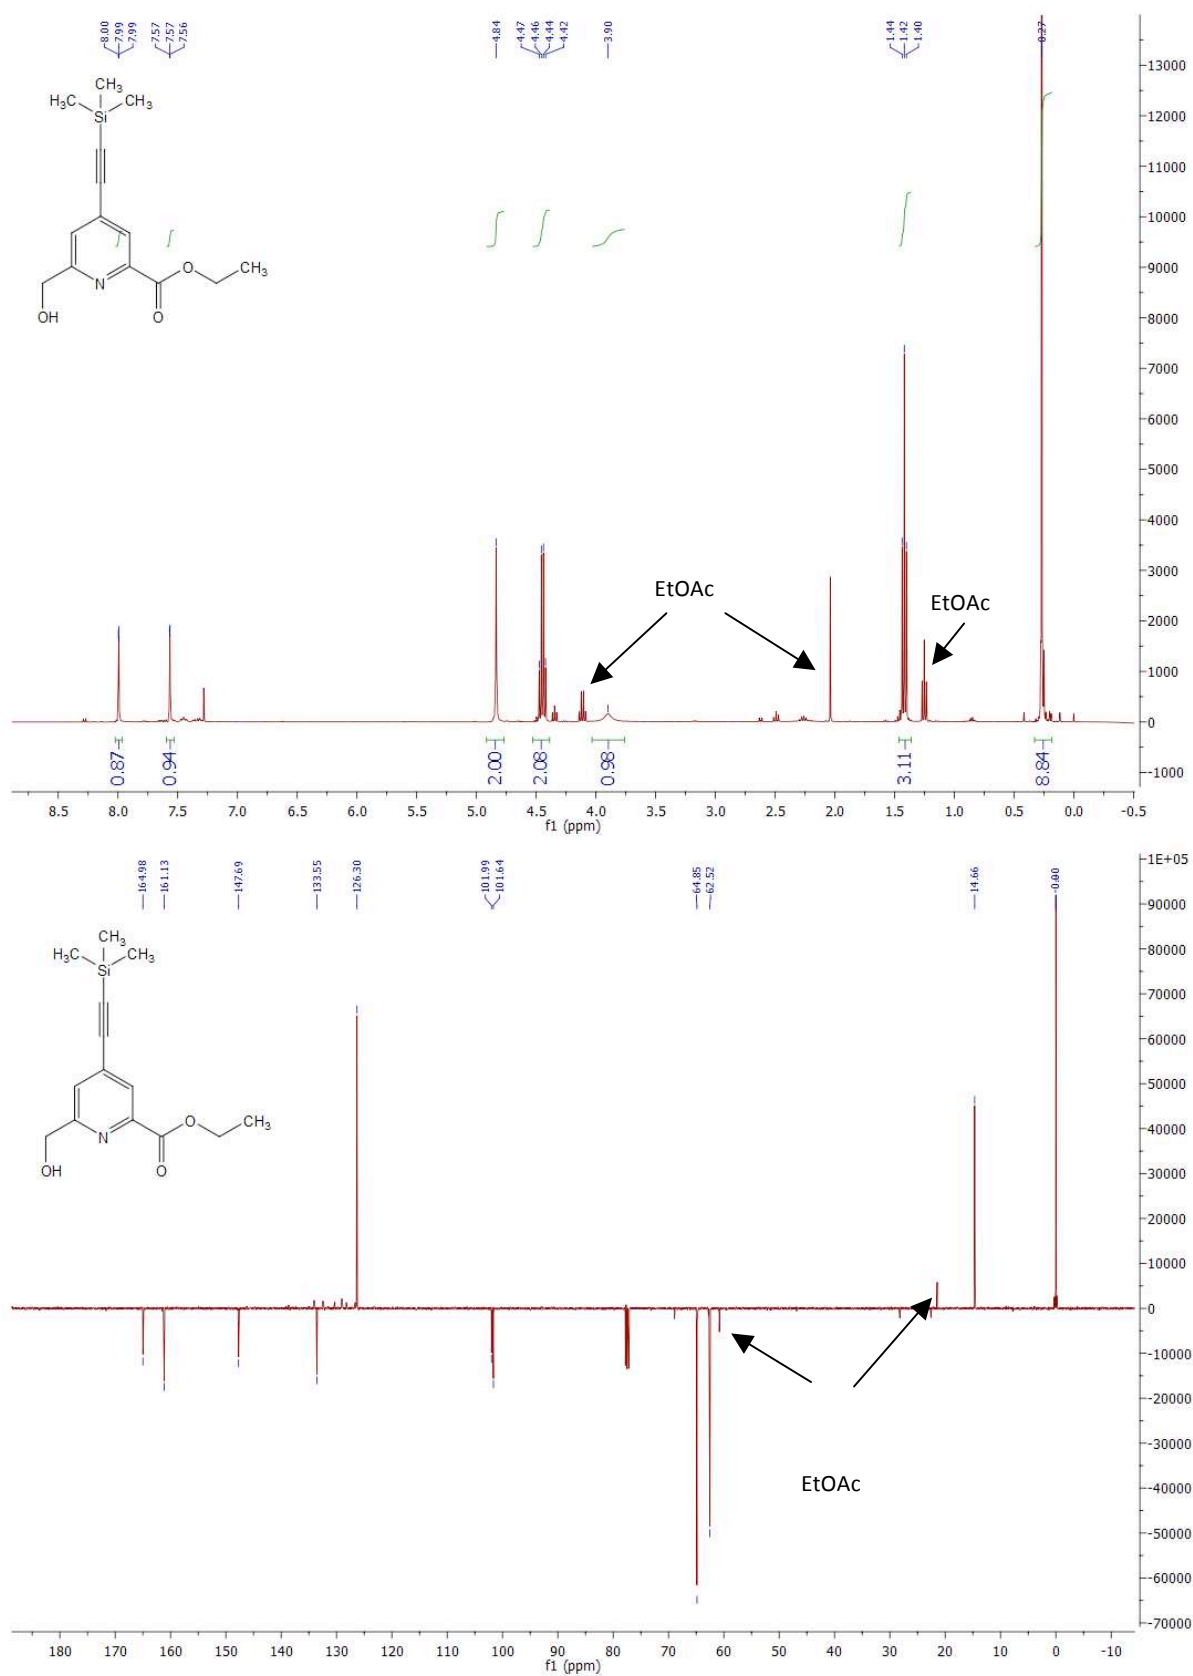

**Figure S12.** <sup>1</sup>H and <sup>13</sup>C NMR spectra of **6** in CDCl<sub>3</sub>.

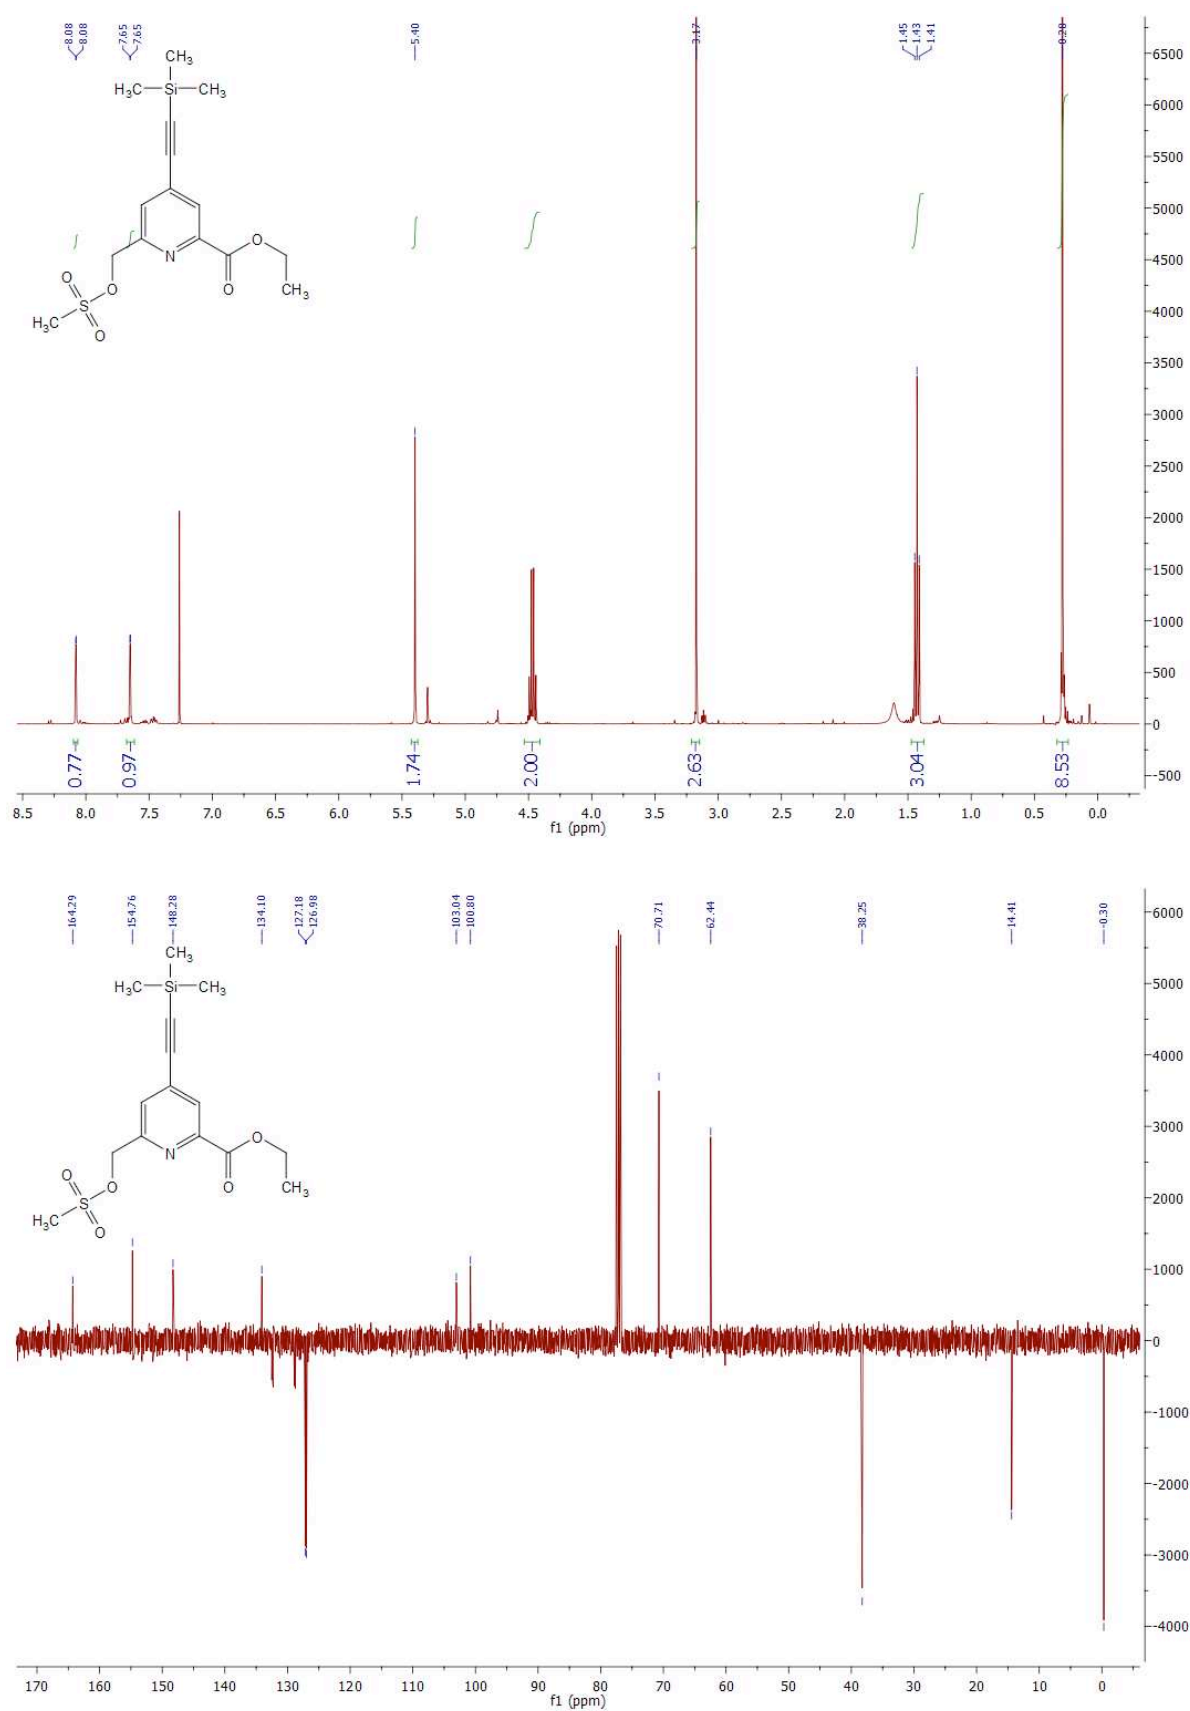

**Figure S13.** <sup>1</sup>H and <sup>13</sup>C NMR spectra of 7 in CDCl<sub>3</sub>.

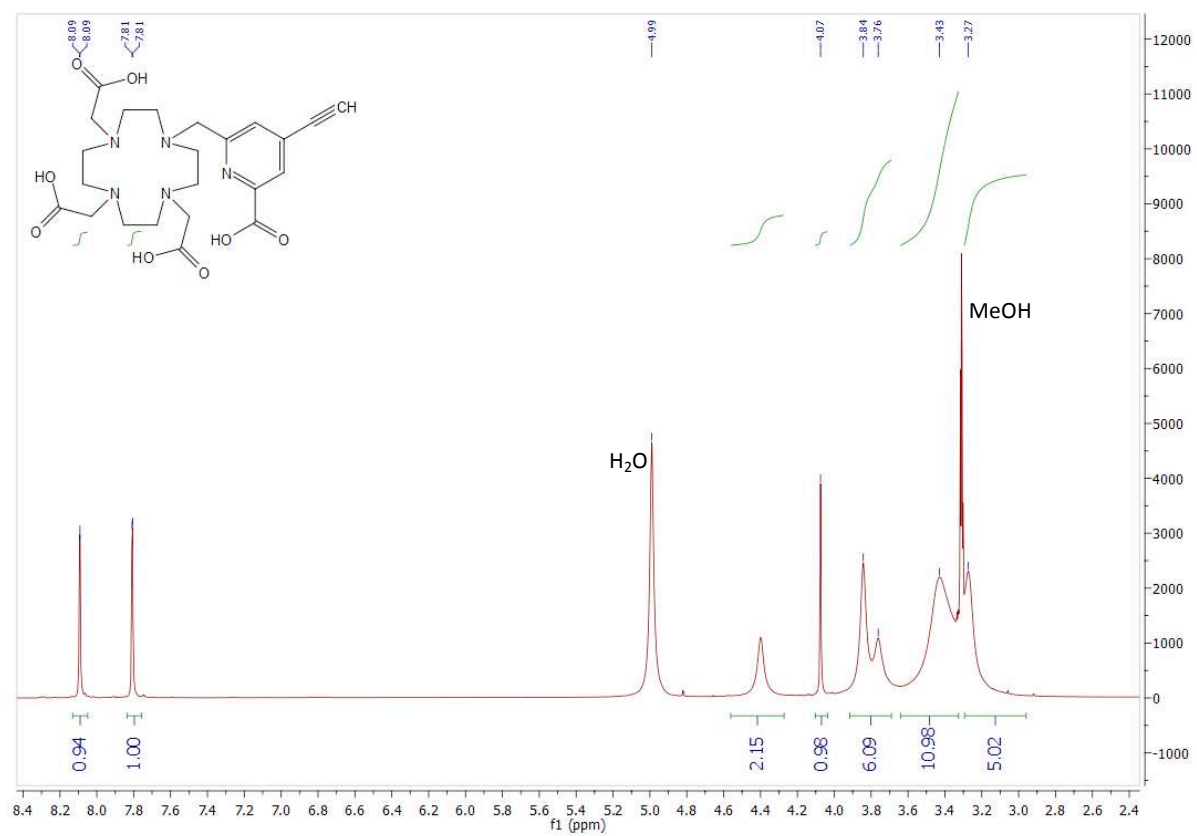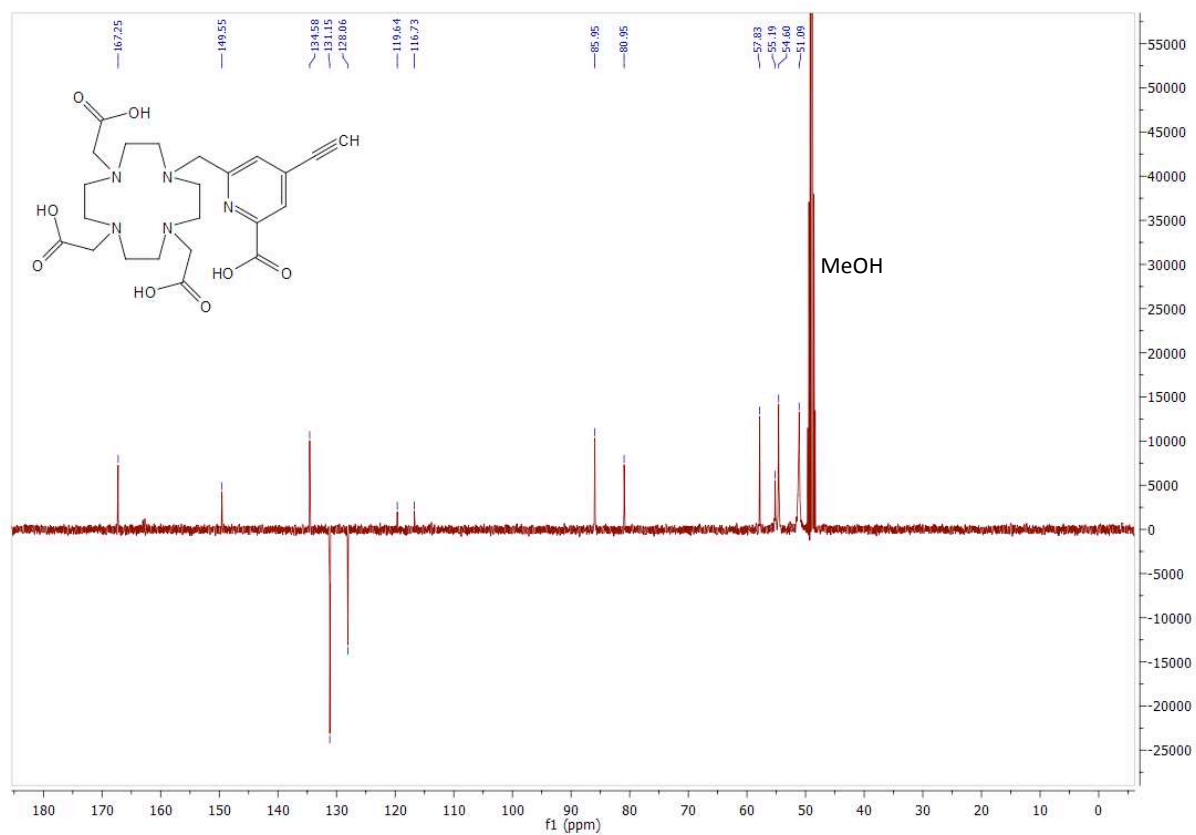

**Figure S14.** <sup>1</sup>H and <sup>13</sup>C NMR spectra of H<sub>4</sub>L<sup>2</sup> in MeOD.

## LC traces for ligands

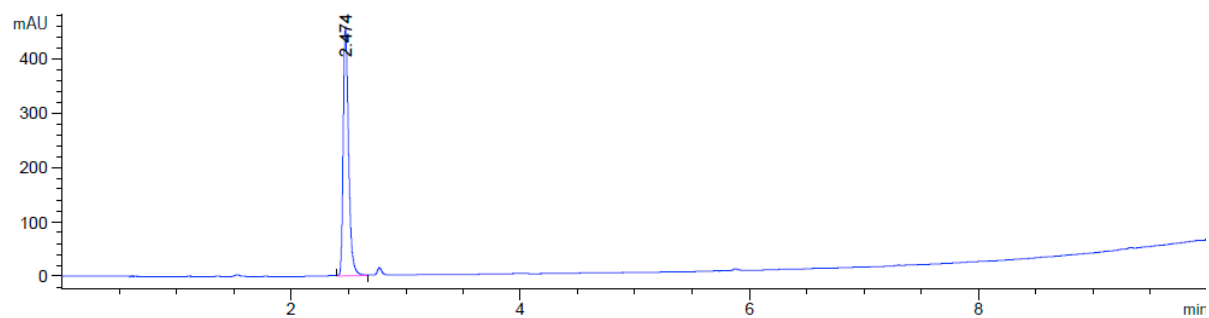

**Figure S15.** LC trace for H<sub>3</sub>L<sup>1</sup>.

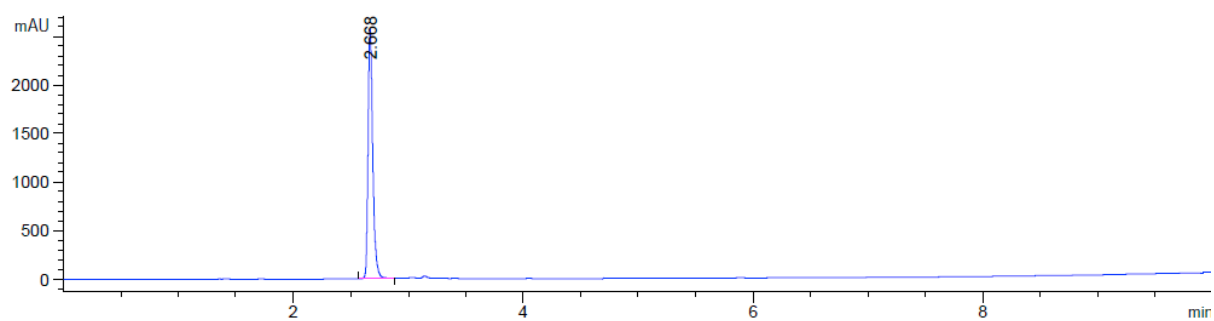

**Figure S16.** LC trace for H<sub>4</sub>L<sup>2</sup>.

## LC traces for terbium(III) complexes

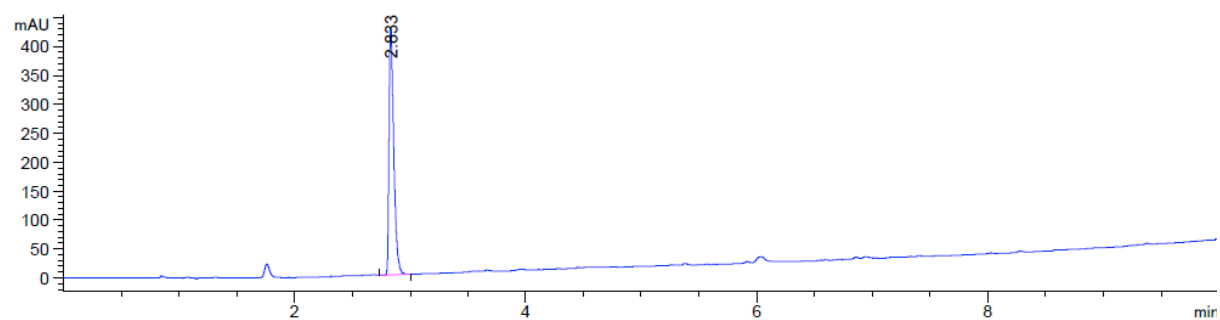

Figure S17. LC trace for Tb-L<sup>1</sup>.

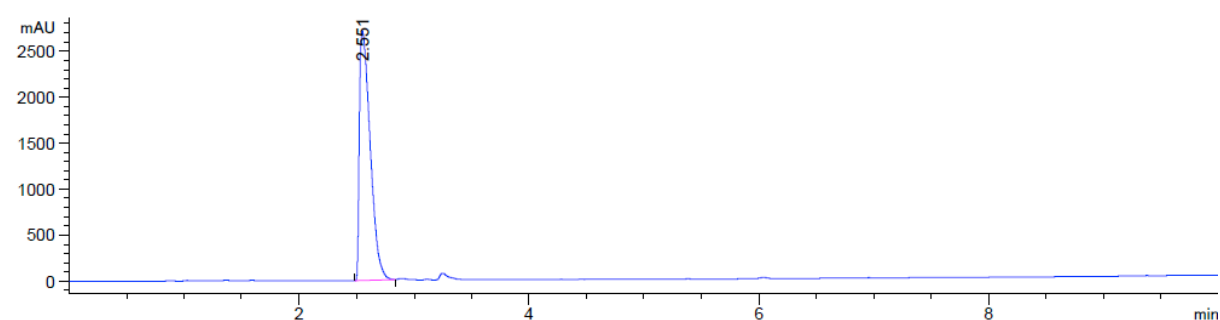

Figure S18. LC trace for Tb-L<sup>2</sup>.

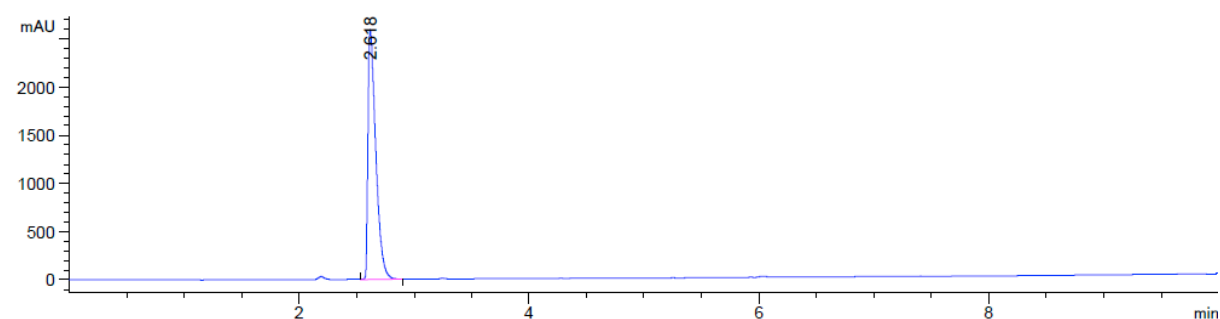

Figure S19. LC trace for clicked Tb-L<sup>1</sup>.

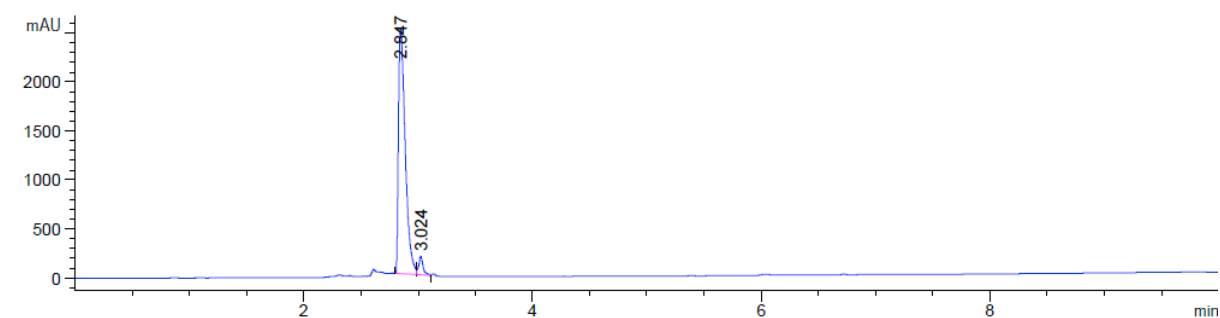

Figure S20. LC trace for clicked Tb-L<sup>2</sup>.
